# Supplementary material for: Deformability based Cell Sorting using Microfluidic Ratchets Enabling Phenotypic Separation of Leukocytes Directly from Whole Blood
Source: PubMed Central journal article supplement (PMC5529452; doi:10.1038/s41598-017-06865-x), 2017-07-26
Supplement: 41598_2017_6865_MOESM1_ESM.pdf [file 41598_2017_6865_MOESM1_ESM.pdf]

**Supplemental Information for:**

**Deformability based Cell Sorting using Microfluidic Ratchets Enabling Phenotypic Separation of Leukocytes Directly from Whole Blood**

Quan Guo<sup>a</sup>, Simon P. Duffy<sup>a</sup>, Kerryn Matthews<sup>a</sup>, Emel Islamzada<sup>a</sup>, and Hongshen Ma<sup>a,b,c\*</sup>

*a Department of Mechanical Engineering, University of British Columbia, 2054-6250 Applied Science Lane, Vancouver, BC, Canada V6T 1Z4*

*b Department of Urologic Science, University of British Columbia, Vancouver, BC, Canada*

*c Vancouver Prostate Centre, Vancouver General Hospital, Vancouver, BC, Canada*

**\* Corresponding Author:**

Dr. Hongshen Ma

[hongma@mech.ubc.ca](mailto:hongma@mech.ubc.ca)

*Department of Mechanical Engineering  
University of British Columbia  
2054-6250 Applied Science Lane  
Vancouver, BC, Canada V6T 1Z4*

**ONE SENTENCE SUMMARY:**

We developed a microfluidic device capable of biophysically separating leukocytes directly from whole blood with 100% purity and <2% loss, as well as sorting leukocytes to enrich for granulocytes and lymphocytes.

1

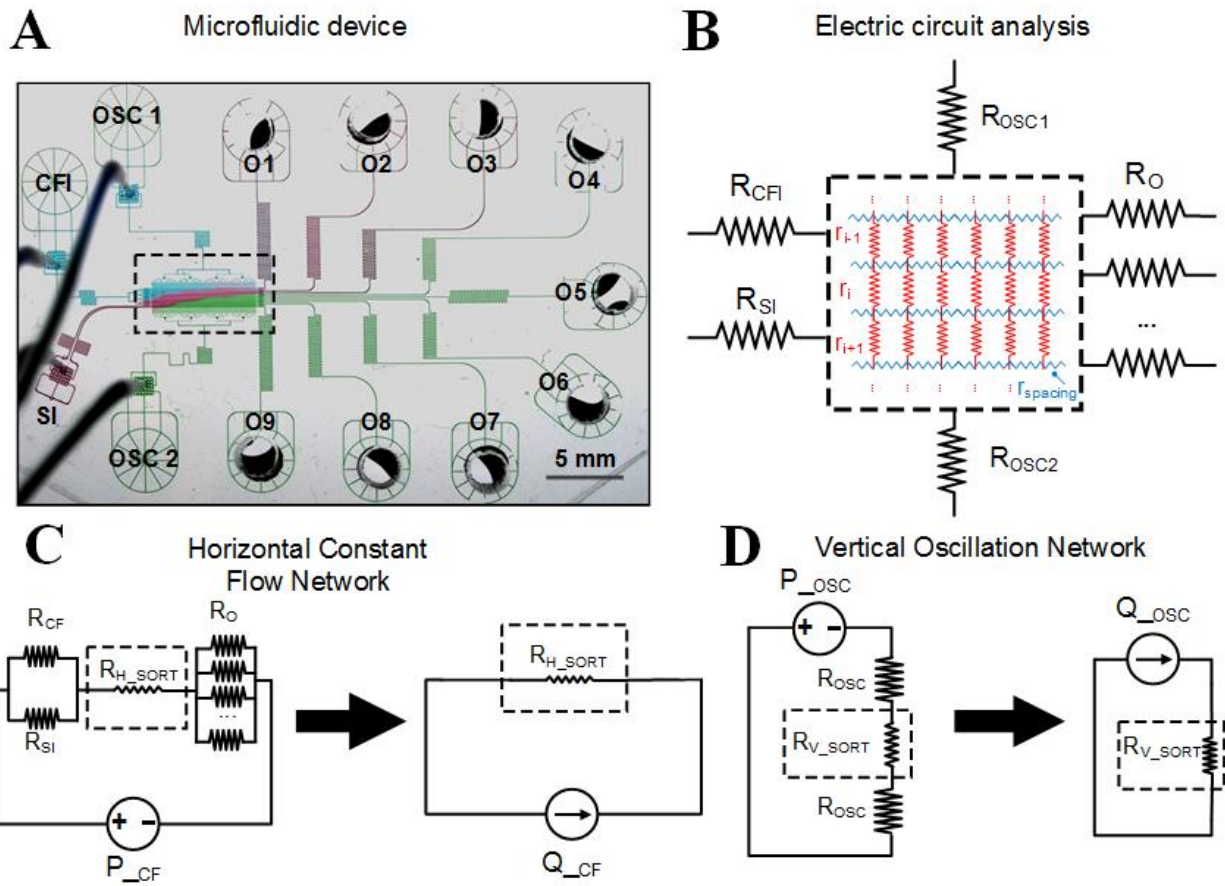

2

3 **Figure S1:** Hydrodynamic resistance model of the microfluidic device. **(A)** Image of the  
 4 microfluidic device and **(B)** its equivalent hydrodynamic circuit model analysis; **(C)** electric circuit  
 5 equivalent to the **(C)** horizontal flow network and **(D)** vertical oscillation network

6 **Table S1.** Summary of the hydrodynamic resistance of various components of the device  
7

|                                              | Components          | Hydrodynamic Resistance<br>(Pa·s·m <sup>3</sup> ) |
|----------------------------------------------|---------------------|---------------------------------------------------|
| <b>Vertical Oscillatory<br/>Flow Channel</b> | R <sub>V_SORT</sub> | 2.35×10 <sup>13</sup>                             |
|                                              | R <sub>OSC</sub>    | 6.75×10 <sup>14</sup>                             |
| <b>Horizontal Flow<br/>Channel</b>           | R <sub>H_SORT</sub> | 7.59×10 <sup>13</sup>                             |
|                                              | R <sub>SI</sub>     | 3.79×10 <sup>14</sup>                             |
|                                              | R <sub>CFI</sub>    | 4.90×10 <sup>14</sup>                             |
|                                              | R <sub>O</sub>      | 1.54×10 <sup>15</sup>                             |

8

## 9 HYDRODYNAMIC MODEL

10 Laminar fluid flow can be modelled using standard methods of linear electrical circuit analysis.  
11 Specifically, fluid flow in a microfluidic channel is linearly proportional to the pressure drop across  
12 the length of the channel. For incompressible fluid, the volume is conserved and therefore,  
13 pressure and the flow rate can be determined from,

$$14 \quad \Delta P = R_H \times Q, \quad (S1)$$

15 where  $\Delta P$  is the pressure difference (Pa) across the fluidic channel,  $Q$  is the volumetric flow rate  
16 (m<sup>3</sup>·s<sup>-1</sup>) and  $R_H$  is the hydrodynamic resistance (Pa·s·m<sup>3</sup>). **Figure S1B** illustrates the equivalent  
17 hydrodynamic circuit for the leukocyte sorting microfluidic device (**Figure S1A**), which has  
18 components including cross flow network ( $R_{CF}$ ), sample inlet network ( $R_{SI}$ ), oscillation network  
19 ( $R_{OSC}$ ) and outlet networks ( $R_O$ ). Fluid flow in the sorting region can be considered as a  
20 superposition of the horizontal constant flow circuit (**Figure S1C**) and vertical oscillation flow  
21 circuit (**Figure S1D**). In the vertical circuit, the hydrodynamic resistance of the sorting region,  
22  $R_{V\_SORT}$ , can be determined by adding up the resistances of the individual funnel constrictions,

$$23 \quad R_{V\_SORT} = \frac{\sum_i^{n_{row}} r_i}{n_{column}}, \quad (S2)$$

## Deformability based sorting of leukocytes

24 where  $n_{row}$  and  $n_{column}$  are the number of funnel rows and columns in the matrix,  $r_i$  is the  
25 resistance of the individual funnel and the value of each  $r_i$  is determined using finite element  
26 simulation (COMSOL multiphysics). In the horizontal circuit, the hydrodynamic resistance of the  
27 sorting matrix,  $R_{H\_SORT}$ , can be determined from the resistance of the spacing between each  
28 funnel row ( $r_{spacing}$ ) using

$$29 \quad R_{H\_SORT} = \frac{r_{spacing}}{n_{spacing}}, \quad (S3)$$

30 where  $n_{spacing}$  is the number of horizontal spacings in the sorting matrix.

31 The supporting microchannel networks ( $R_o$ ,  $R_{osc}$ ,  $R_{cf}$  and  $R_{si}$ ) are designed to present a dominant  
32 hydrodynamic resistance (>50X) over that of the sorting region, allowing precise control of fluid  
33 flow using pressure-driven flow from the inlets. The full listing of the hydrodynamic resistance  
34 values of these components are in **Table S1**. This hydrodynamic design provides a constant flow  
35 rate in the funnel matrix, whose resistance may vary with the number of cells in the funnel matrix,  
36 and thereby ensures that each cell experiences a nearly constant deformation pressure. This  
37 design further serves to dramatically reduce the pressure applied at the inlets to derive an  
38 attenuated pressure for each cell. Specifically, the oscillation pressures ranging from 14 to 20 kPa  
39 applied at the oscillation inlets are reduced to approximately 5 to 30 Pa at funnel constrictions,  
40 which was on the same order of pressure magnitude for individual leukocyte and erythrocytes  
41 deformation through funnels determined previously [1, 2].

42

### 43 **MICROFLUIDIC DEVICE OPERATION**

44 Operation of the microfluidic device involves initially introducing the blood sample under pre-  
45 determined pressure settings for the blood sample inlet (SI), cross flow inlet (CFI), downward  
46 (OSC1) and upward (OSC2) oscillation as well as oscillation frequency for OSC1 and OSC2. These  
47 parameters were empirically determined to produce a characteristic diagonal stream across the  
48 rectangular sorting region. The filtration pressure (OSC2) is set by observing the angle of the  
49 samples diagonal stream. If the filtration pressure (OSC2) is too low, the cells do not have  
50 sufficient time to test each row of funnel and will exit the sorting region prematurely. If the

## Deformability based sorting of leukocytes

51 filtration pressure is too high, RBCs will exit the sorting region through the top oscillation channel.  
52 This also increases the likelihood of rupturing leukocytes while being squeezed through their  
53 limiting funnel opening, causing cell adsorption and potential clogging of the system. The  
54 acceptable range of filtration pressure was determined to be 14 kPa to 20 kPa, which confines  
55 the cell sample within the sorting region while allowing cells, particularly leukocytes to reach  
56 their limiting funnel opening and to be collected in the corresponding outlets. The oscillation was  
57 set to bias upwards (OSC2) to filter the cells for 4 seconds and downwards (OSC1) to de-clog the  
58 cells for 1 second. To minimize the interruption of reverse flow for de-clogging, it was  
59 determined that 1 second of downward oscillation at 14 kPa was sufficient to release any cells  
60 trapped in the funnel constrictions. Upward oscillation longer than 4 seconds may increase the  
61 likelihood of cells being adsorbed in the funnels, which may lead to the eventual clogging of the  
62 funnel matrix. The pressure for the SI determines the throughput of the sorting process as a  
63 smaller SI pressure will limit the number of cells infused into the sorting region. The CFI pressure  
64 creates a constant horizontal flow and plays an important role in forming the characteristic  
65 diagonal trajectory. A high CFI pressure will force the cells to traverse through the sorting matrix  
66 prematurely and a low CFI pressure will cause the sample infused from SI to travel into the CFI  
67 networks during the upwards oscillation. Accordingly, the pressure values for both CFI and SI are  
68 set between 50-60 mbar (5 to 6 kPa).

69

### 70 FLOW RATE CALCULATION

71 Based on the hydrodynamic resistance model and acceptable sample inlet pressure determined  
72 empirically, the theoretical volumetric flow rate ( $Q_{TH}$ ) can be calculated using:

$$73 \quad Q_{TH} = \frac{P_{SI}}{R_{SI-O}} , \quad (S4)$$

74 Where  $P_{SI}$  is sample inlet pressure (5 - 6kPa) and  $R_{SI-O}$  is total hydrodynamic resistance from  
75 sample inlet to outlet.  $Q_{TH}$  is calculated to be 2.36 - 2.84  $\mu\text{L}/\text{hour}$ . The result has been confirmed  
76 by experiment. Specifically, the volumetric flow rate is estimated to be 5  $\mu\text{L}/\text{hour}$  using:

$$77 \quad Q = \frac{\text{Total number of leukocytes collected at outlet per hour}}{\text{Concentration of leukocyte in the input sample}} \quad (S5)$$

78

79 **Supplemental Video: Leukocyte isolation from whole blood using the microfluidic ratchets.**

80 Blood sample was pre-stained with Hoechst 33342 DNA stain and infused into the sorting

81 region. The cells (erythrocytes and leukocytes) formed the characteristic diagonal trajectory.

82 Individual leukocytes (blue) that have reached their limiting funnel constrictions were found to

83 transit horizontally and collected in O4-9 while erythrocytes were collected in O1-3 exclusively.

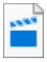

Supplemental  
Video.avi

84

85
